# Supplementary material for: Diagnostic Performance of Positron Emission Tomography with Fibroblast-Activating Protein Inhibitors in Gastric Cancer: A Systematic Review and Meta-Analysis
Source: MDPI journal article supplement (doi:10.3390/ijms241210136), 2023-06-14
Supplement: s1 [file s1]

| Excluded Studies                                                                                                                                                                                                                                                                                                                                               | Reason for exclusion                                                                                  |
|----------------------------------------------------------------------------------------------------------------------------------------------------------------------------------------------------------------------------------------------------------------------------------------------------------------------------------------------------------------|-------------------------------------------------------------------------------------------------------|
| Kratochwil, C.; Flechsig, P.; Lindner, T.; Abderrahim, L.; Altmann, A.; Mier, W.; Adeberg, S.; Rathke, H.; Röhrich, M.; Winter, H.; et al. 68Ga-FAPI PET/CT: Tracer Uptake in 28 Different Kinds of Cancer. <i>J Nucl Med</i> <b>2019</b> , <i>60</i> , 801–805, doi:10.2967/jnumed.119.227967.                                                                | Original Study not in the field of interest                                                           |
| Pang, Y.; Huang, H.; Fu, L.; Zhao, L.; Chen, H. 68Ga-FAPI PET/CT Detects Gastric Signet-Ring Cell Carcinoma in a Patient Previously Treated for Prostate Cancer. <i>Clin Nucl Med</i> <b>2020</b> , <i>45</i> , 632–635, doi:10.1097/RLU.0000000000003099.                                                                                                     | Case report in the field of interest                                                                  |
| Wang, G.; Jin, X.; Zhu, H.; Wang, S.; Ding, J.; Zhang, Y.; Yang, Z.; Wang, X. 68Ga-NOTA-FAPI-04 PET/CT in a Patient with Primary Gastric Diffuse Large B Cell Lymphoma: Comparisons with [18F] FDG PET/CT. <i>Eur J Nucl Med Mol Imaging</i> <b>2021</b> , <i>48</i> , 647–648, doi:10.1007/s00259-020-04946-0.                                                | Case report not in the field of interest                                                              |
| Fan, C.; Guo, W.; Su, G.; Chen, B.; Chen, H. Widespread Metastatic Gastric Signet-Ring Cell Carcinoma Shown by 68Ga-FAPI PET/CT. <i>Clin Nucl Med</i> <b>2021</b> , <i>46</i> , e78–e79, doi:10.1097/RLU.0000000000003245.                                                                                                                                     | Case report in the field of interest                                                                  |
| Guo, W.; Chen, H. 68Ga FAPI PET/CT Imaging in Peritoneal Carcinomatosis. <i>Radiology</i> <b>2020</b> , <i>297</i> , 521, doi:10.1148/radiol.2020202469.                                                                                                                                                                                                       | Case report not in the field of interest                                                              |
| Zhao, L.; Pang, Y.; Luo, Z.; Fu, K.; Yang, T.; Zhao, L.; Sun, L.; Wu, H.; Lin, Q.; Chen, H. Role of [68Ga]Ga-DOTA-FAPI-04 PET/CT in the Evaluation of Peritoneal Carcinomatosis and Comparison with [18F]-FDG PET/CT. <i>Eur J Nucl Med Mol Imaging</i> <b>2021</b> , <i>48</i> , 1944–1955, doi:10.1007/s00259-020-05146-6.                                   | Original Study not in the field of interest                                                           |
| Lin, R.; Lin, Z.; Zhang, J.; Yao, S.; Miao, W. Increased 68Ga-FAPI-04 Uptake in Schmorl Node in a Patient With Gastric Cancer. <i>Clin Nucl Med</i> <b>2021</b> , <i>46</i> , 700–702, doi:10.1097/RLU.0000000000003623.                                                                                                                                       | Case report in the field of interest                                                                  |
| Song, Y.; Qin, C.; Liu, F.; Lan, X. Fibrous Dysplasia Mimicking Skeletal Metastasis on 68Ga-FAPI PET Imaging. <i>Clin Nucl Med</i> <b>2021</b> , <i>46</i> , 774–775, doi:10.1097/RLU.0000000000003671.                                                                                                                                                        | Case report not in the field of interest                                                              |
| Alan-Selçuk, N.; Ergen, S.; Demirci, E.; Ocak, M.; Kabasakal, L. [68Ga]DOTA-FAPI-04 PET/CT Imaging in a Case of a Signet Ring Cell Carcinoma of Stomach. <i>Eur J Nucl Med Mol Imaging</i> <b>2021</b> , <i>48</i> , 4523–4524, doi:10.1007/s00259-021-05213-6.                                                                                                | Case report in the field of interest                                                                  |
| Pang, Y.; Zhao, L.; Meng, T.; Xu, W.; Lin, Q.; Wu, H.; Zhang, J.; Chen, X.; Sun, L.; Chen, H. PET Imaging of Fibroblast Activation Protein in Various Types of Cancer Using 68Ga-FAP-2286: Comparison with 18F-FDG and 68Ga-FAPI-46 in a Single-Center, Prospective Study. <i>J Nucl Med</i> <b>2023</b> , <i>64</i> , 386–394, doi:10.2967/jnumed.122.264544. | Original study in the field of interest, but enrolling patients with tumors other than gastric cancer |
| Şahin, E.; Elboğa, U.; Çelen, Y.Z.; Sever, Ö.N.; Çayırılı, Y.B.; Çimen, U. Comparison of 68Ga-DOTA-FAPI and 18FDG PET/CT Imaging Modalities in the Detection of Liver Metastases in Patients with Gastrointestinal System Cancer. <i>Eur J Radiol</i> <b>2021</b> , <i>142</i> , 109867, doi:10.1016/j.ejrad.2021.109867.                                      | Original study in the field of interest, but enrolling patients with tumors other than gastric cancer |
| Chen, X.; Wei, M.; Wang, S.; Yang, Z.; Wang, X. Characterizing Concomitant Follicular Lymphoma and Gastric Carcinoma Using 68Ga-FAPI-04 and 18F-FDG PET/CT. <i>Clin Nucl Med</i> <b>2022</b> , <i>47</i> , 81–82, doi:10.1097/RLU.0000000000003781.                                                                                                            | Case report in the field of interest                                                                  |
| Huang, Y.; Cao, J.; Peng, D.; Liu, H.; Chen, Y. Bone Marrow Metastases From Gastric Adenocarcinoma on 68Ga-FAPI-04 PET/CT. <i>Clin Nucl Med</i> <b>2022</b> , <i>47</i> , 151–153, doi:10.1097/RLU.0000000000003839.                                                                                                                                           | Case report in the field of interest                                                                  |
| Peng, D.; He, J.; Liu, H.; Cao, J.; Wang, Y.; Chen, Y. FAPI PET/CT Research Progress in Digestive System Tumours. <i>Dig Liver Dis</i> <b>2022</b> , <i>54</i> , 164–169,                                                                                                                                                                                      | Review in the field of interest                                                                       |

|                                                                                                                                                                                                                                                                                                                                                                                                                                |                                                                     |
|--------------------------------------------------------------------------------------------------------------------------------------------------------------------------------------------------------------------------------------------------------------------------------------------------------------------------------------------------------------------------------------------------------------------------------|---------------------------------------------------------------------|
| doi:10.1016/j.dld.2021.07.011.                                                                                                                                                                                                                                                                                                                                                                                                 |                                                                     |
| Qiu, L.; Lan, L.; Liu, H.; Deng, J.; Chen, Y. 68Ga-FAPI PET/CT Detected Non-FDG-Avid Gastric Stromal Tumor. <i>Clin Nucl Med</i> <b>2022</b> , <i>47</i> , 226–227, doi:10.1097/RLU.0000000000003856.                                                                                                                                                                                                                          | Case report in the field of interest                                |
| Guo, Y.-H.; Yang, M.-F. Comparison of 18F-AlF-NOTA-FAPI and 18F-FDG Imaging in a Patient With Gastric Signet-Ring Cell Carcinoma. <i>Clin Nucl Med</i> <b>2021</b> , <i>46</i> , 929–930, doi:10.1097/RLU.0000000000003742.                                                                                                                                                                                                    | Case report in the field of interest                                |
| Kou, Y.; Yao, Z.; Cheng, Z. Al18F-NOTA-FAPI-04 Outperforms 18F-FDG PET/CT in Identifying the Primary Lesion and Rare Metastases From Gastric Cancer. <i>Clin Nucl Med</i> <b>2021</b> , <i>46</i> , e570–e571, doi:10.1097/RLU.0000000000003727.                                                                                                                                                                               | Case report in the field of interest                                |
| Mona, C.E.; Benz, M.R.; Hikmat, F.; Grogan, T.R.; Lueckerath, K.; Razmaria, A.; Riahi, R.; Slavik, R.; Girgis, M.D.; Carlucci, G.; et al. Correlation of 68Ga-FAPi-46 PET Biodistribution with FAP Expression by Immunohistochemistry in Patients with Solid Cancers: Interim Analysis of a Prospective Translational Exploratory Study. <i>J Nucl Med</i> <b>2022</b> , <i>63</i> , 1021–1026, doi:10.2967/jnumed.121.262426. | Original Study not in the field of interest                         |
| Gündoğan, C.; Güzel, Y.; Can, C.; Kaplan, İ.; Kömek, H. FAPI-04 Uptake in Healthy Tissues of Cancer Patients in 68Ga-FAPI-04 PET/CT Imaging. <i>Contrast Media Mol Imaging</i> <b>2021</b> , <i>2021</i> , 9750080, doi:10.1155/2021/9750080.                                                                                                                                                                                  | Original Study not in the field of interest                         |
| Erol Fenercioğlu, Ö.; Beyhan, E.; Arslan, E.; Çermik, T.F.; Ergül, N. Intense 68Ga-DOTA-FAPI-04 Uptake in Diffuse Sclerotic Skeletal Metastases of Gastric Cancer. <i>Clin Nucl Med</i> <b>2022</b> , <i>47</i> , e325–e326, doi:10.1097/RLU.0000000000004052.                                                                                                                                                                 | Case report in the field of interest                                |
| Yang, T.; Ma, L.; Hou, H.; Gao, F.; Tao, W. FAPI PET/CT in the Diagnosis of Abdominal and Pelvic Tumors. <i>Front Oncol</i> <b>2021</b> , <i>11</i> , 797960, doi:10.3389/fonc.2021.797960.                                                                                                                                                                                                                                    | Review in the field of interest                                     |
| Çermik, T.F.; Ergül, N.; Yılmaz, B.; Mercanoğlu, G. Tumor Imaging With 68Ga-DOTA-FAPI-04 PET/CT: Comparison With 18F-FDG PET/CT in 22 Different Cancer Types. <i>Clin Nucl Med</i> <b>2022</b> , <i>47</i> , e333–e339, doi:10.1097/RLU.0000000000004073.                                                                                                                                                                      | Original study not in the field of interest                         |
| Gilardi, L.; Airò Farulla, L.S.; Demirci, E.; Clerici, I.; Omodeo Salè, E.; Ceci, F. Imaging Cancer-Associated Fibroblasts (CAFs) with FAPi PET. <i>Biomedicines</i> <b>2022</b> , <i>10</i> , 523, doi:10.3390/biomedicines10030523.                                                                                                                                                                                          | Review not in the field of interest.                                |
| Af Burén, S.; Tran, T.A.; Klevebro, F.; Holstensson, M.; Axelsson, R. A 68Ga-FAPI-46 PET/CT Imaging Pitfall in Assessing Residual Gastric Cancer Early After Chemotherapy. <i>Clin Nucl Med</i> <b>2022</b> , <i>47</i> , 644–645, doi:10.1097/RLU.0000000000004143.                                                                                                                                                           | Case report in the field of interest                                |
| Fu, L.; Huang, S.; Wu, H.; Dong, Y.; Xie, F.; Wu, R.; Zhou, K.; Tang, G.; Zhou, W. Superiority of [68Ga]Ga-FAPI-04/[18F]FAPI-42 PET/CT to [18F]FDG PET/CT in Delineating the Primary Tumor and Peritoneal Metastasis in Initial Gastric Cancer. <i>Eur Radiol</i> <b>2022</b> , <i>32</i> , 6281–6290, doi:10.1007/s00330-022-08743-1.                                                                                         | Original study in the field of interest, retracted from publication |
| Wang, S.; Huang, Q.; Dong, K.; Qin, C.; Wen, G. Double Trap Escape: Omental Nodular Hyperplasia Misdiagnosed as Metastasis by 18F-FDG PET/CT and 68Ga-FAPI PET/MRI in a Patient With Gastric Adenocarcinoma. <i>Clin Nucl Med</i> <b>2022</b> , <i>47</i> , 551–552, doi:10.1097/RLU.0000000000004192.                                                                                                                         | Case report in the field of interest                                |
| Hotta, M.; Rieger, A.C.; Jafarvand, M.G.; Menon, N.; Farolfi, A.; Benz, M.R.; Calais, J. Non-Oncologic Incidental Uptake on FAPI PET/CT Imaging. <i>Br J Radiol</i> <b>2023</b> , <i>96</i> , 20220463, doi:10.1259/bjr.20220463.                                                                                                                                                                                              | Review not in the field of interest                                 |

|                                                                                                                                                                                                                                                                                                                                                                                                                              |                                                                                                       |
|------------------------------------------------------------------------------------------------------------------------------------------------------------------------------------------------------------------------------------------------------------------------------------------------------------------------------------------------------------------------------------------------------------------------------|-------------------------------------------------------------------------------------------------------|
| Fendler, W.P.; Pabst, K.M.; Kessler, L.; Fragoso Costa, P.; Ferdinandus, J.; Weber, M.; Lippert, M.; Lueckerath, K.; Umutlu, L.; Kostbade, K.; et al. Safety and Efficacy of 90Y-FAPI-46 Radioligand Therapy in Patients with Advanced Sarcoma and Other Cancer Entities. <i>Clin Cancer Res</i> <b>2022</b> , <i>28</i> , 4346–4353, doi:10.1158/1078-0432.CCR-22-1432.                                                     | Original article not in the field of interest                                                         |
| Tatar, G.; Beyhan, E.; Erol Fenercioğlu, Ö.; Arslan, E.; Çermik, T.F. Comparison of 18F-FDG and 68Ga-FAPI PET/CT in Gastric Kaposi Sarcoma. <i>Clin Nucl Med</i> <b>2022</b> , <i>47</i> , e596–e599, doi:10.1097/RLU.0000000000004172.                                                                                                                                                                                      | Case report not in the field of interest                                                              |
| Qin, C.; Song, Y.; Gai, Y.; Ruan, W.; Liu, Q.; Liu, F.; Zheng, D.; Zhang, P.; Liu, H.; Zhang, T.; et al. Gallium-68-Labeled Fibroblast Activation Protein Inhibitor PET in Gastrointestinal Cancer: Insights into Diagnosis and Management. <i>Eur J Nucl Med Mol Imaging</i> <b>2022</b> , <i>49</i> , 4228–4240, doi:10.1007/s00259-022-05847-0.                                                                           | Original study in the field of interest, but enrolling patients with tumors other than gastric cancer |
| Veldhuijzen van Zanten, S.E.M.; Pieterman, K.J.; Wijnhoven, B.P.L.; Pruis, I.J.; Groot Koerkamp, B.; van Driel, L.M.J.W.; Verburg, F.A.; Thomeer, M.G.J. FAPI PET versus FDG PET, CT or MRI for Staging Pancreatic-, Gastric- and Cholangiocarcinoma: Systematic Review and Head-to-Head Comparisons of Diagnostic Performances. <i>Diagnostics (Basel)</i> <b>2022</b> , <i>12</i> , 1958, doi:10.3390/diagnostics12081958. | Review in the field of interest                                                                       |
| Deng, M.; Cai, L. Detection of Occult Gastric Adenocarcinoma by 68Ga-FAPI-04 PET/CT. <i>AJR Am J Roentgenol</i> <b>2023</b> , <i>220</i> , 444, doi:10.2214/AJR.22.28325.                                                                                                                                                                                                                                                    | Case report in the field of interest                                                                  |
| Pang, Y.; Zhao, L.; Meng, T.; Xu, W.; Lin, Q.; Wu, H.; Zhang, J.; Chen, X.; Sun, L.; Chen, H. PET Imaging of Fibroblast Activation Protein in Various Types of Cancer Using 68Ga-FAP-2286: Comparison with 18F-FDG and 68Ga-FAPI-46 in a Single-Center, Prospective Study. <i>J Nucl Med</i> <b>2023</b> , <i>64</i> , 386–394, doi:10.2967/jnumed.122.264544.                                                               | Original study not in the field of interest                                                           |
| Beyhan, E.; Erol Fenercioğlu, Ö.; Yarikaya, E.; Çermik, T.F.; Ergül, N. Chronic Gastritis Mimicking Malignancy on 68 Ga-FAPI-04 PET/CT. <i>Clin Nucl Med</i> <b>2023</b> , <i>48</i> , e37–e39, doi:10.1097/RLU.0000000000004439.                                                                                                                                                                                            | Case report in the field of interest                                                                  |
| Huang, D.; Wu, J.; Zhong, H.; Li, Y.; Han, Y.; He, Y.; Chen, Y.; Lin, S.; Pang, H. [68Ga]Ga-FAPI PET for the Evaluation of Digestive System Tumors: Systematic Review and Meta-Analysis. <i>Eur J Nucl Med Mol Imaging</i> <b>2023</b> , <i>50</i> , 908–920, doi:10.1007/s00259-022-06021-2.                                                                                                                                | Review in the field of interest                                                                       |
| Li, T.; Jiang, X.; Zhang, Z.; Chen, X.; Wang, J.; Zhao, X.; Zhang, J. Case Report: 68Ga-FAPI PET/CT, a More Advantageous Detection Mean of Gastric, Peritoneal, and Ovarian Metastases from Breast Cancer. <i>Front Oncol</i> <b>2022</b> , <i>12</i> , 1013066, doi:10.3389/fonc.2022.1013066.                                                                                                                              | Case report not in the field of interest                                                              |
| Zhang, Z.; Jiang, H.; Zhang, L.; Cheng, C.; Zuo, C. 68Ga-FAPI-04 PET/CT Versus 18F-FDG PET/CT in the Detection of Malignant Gastrointestinal Stromal Tumor. <i>Clin Nucl Med</i> <b>2023</b> , <i>48</i> , 61–63, doi:10.1097/RLU.0000000000004364.                                                                                                                                                                          | Case report in the field of interest                                                                  |
| Fu, L.; Huang, S.; Wu, H.; Dong, Y.; Xie, F.; Wu, R.; Zhou, K.; Tang, G.; Zhou, W. Retraction Note: Superiority of [68Ga]Ga-FAPI-04/[18F]FAPI-42 PET/CT to [18F]FDG PET/CT in Delineating the Primary Tumor and Peritoneal Metastasis in Initial Gastric Cancer. <i>Eur Radiol</i> <b>2023</b> , doi:10.1007/s00330-022-09386-y.                                                                                             | Retraction note                                                                                       |
| Wang, Y.; Luo, W.; Li, Y. [68Ga]Ga-FAPI-04 PET MRI/CT in the Evaluation of Gastric Carcinomas Compared with [18F]-FDG PET MRI/CT: A Meta-Analysis. <i>Eur J Med Res</i> <b>2023</b> , <i>28</i> , 34, doi:10.1186/s40001-023-00997-9.                                                                                                                                                                                        | Review in the field of interest                                                                       |

|                                                                                                                                                                                                                                                                                                                  |                                                                                                       |
|------------------------------------------------------------------------------------------------------------------------------------------------------------------------------------------------------------------------------------------------------------------------------------------------------------------|-------------------------------------------------------------------------------------------------------|
| Shu, Q.; Wang, Y.; Deng, M.; Chen, X.; Liu, M.; Cai, L. Benign Lesions with 68Ga-FAPI Uptake: A Retrospective Study. <i>Br J Radiol</i> <b>2023</b> , 96, 20220994, doi:10.1259/bjr.20220994.                                                                                                                    | Original study not in the field of interest                                                           |
| Chen, R.; Yang, X.; Ng, Y.L.; Yu, X.; Huo, Y.; Xiao, X.; Zhang, C.; Chen, Y.; Zheng, C.; Li, L.; et al. First Total-Body Kinetic Modeling and Parametric Imaging of Dynamic 68Ga-FAPI-04 PET in Pancreatic and Gastric Cancer. <i>J Nucl Med</i> <b>2023</b> , jnumed.122.264988, doi:10.2967/jnumed.122.264988. | Original study in the field of interest, but enrolling patients with tumors other than gastric cancer |
